# Supplementary material for: Whole genome sequencing analysis to evaluate the influence of T2DM on polymorphisms associated with drug resistance in M. tuberculosis
Source: BMC Genomics. 2022 Jun 24;23:465. doi: 10.1186/s12864-022-08709-z (PMC9229755; doi:10.1186/s12864-022-08709-z)
Supplement: Supplementary file 1 — Additional file 1. Accession numbers of genomes and databases. [file 12864_2022_8709_MOESM1_ESM.xlsx]

## Sheet: Hoja1
RUN ACCESSION	Available at:	Group	Repository
ERR3148163	https://www.ebi.ac.uk/ena/browser/view/ERR3148163?show=reads	TB-T2DM	European Nucleotide Archive
ERR3148165	https://www.ebi.ac.uk/ena/browser/view/ERR3148165?show=reads	TB-T2DM	European Nucleotide Archive
ERR3148170	https://www.ebi.ac.uk/ena/browser/view/ERR3148170?show=reads	TB-T2DM	European Nucleotide Archive
ERR3148171	https://www.ebi.ac.uk/ena/browser/view/ERR3148171?show=reads	TB-T2DM	European Nucleotide Archive
ERR3148172	https://www.ebi.ac.uk/ena/browser/view/ERR3148172?show=reads	TB-T2DM	European Nucleotide Archive
ERR3148173	https://www.ebi.ac.uk/ena/browser/view/ERR3148173?show=reads	TB-T2DM	European Nucleotide Archive
ERR3148174	https://www.ebi.ac.uk/ena/browser/view/ERR3148174?show=reads	TB-T2DM	European Nucleotide Archive
ERR3148175	https://www.ebi.ac.uk/ena/browser/view/ERR3148175?show=reads	TB-T2DM	European Nucleotide Archive
ERR3148176	https://www.ebi.ac.uk/ena/browser/view/ERR3148176?show=reads	TB-T2DM	European Nucleotide Archive
ERR3148186	https://www.ebi.ac.uk/ena/browser/view/ERR3148186?show=reads	TB-T2DM	European Nucleotide Archive
ERR3148187	https://www.ebi.ac.uk/ena/browser/view/ERR3148187?show=reads	TB-T2DM	European Nucleotide Archive
ERR3148188	https://www.ebi.ac.uk/ena/browser/view/ERR3148188?show=reads	TB-T2DM	European Nucleotide Archive
ERR3148189	https://www.ebi.ac.uk/ena/browser/view/ERR3148189?show=reads	TB-T2DM	European Nucleotide Archive
ERR3148190	https://www.ebi.ac.uk/ena/browser/view/ERR3148190?show=reads	TB-T2DM	European Nucleotide Archive
ERR3148191	https://www.ebi.ac.uk/ena/browser/view/ERR3148191?show=reads	TB-T2DM	European Nucleotide Archive
ERR3148192	https://www.ebi.ac.uk/ena/browser/view/ERR3148192?show=reads	TB-T2DM	European Nucleotide Archive
ERR3148197	https://www.ebi.ac.uk/ena/browser/view/ERR3148197?show=reads	TB-T2DM	European Nucleotide Archive
ERR3148200	https://www.ebi.ac.uk/ena/browser/view/ERR3148200?show=reads	TB-T2DM	European Nucleotide Archive
ERR3148208	https://www.ebi.ac.uk/ena/browser/view/ERR3148200?show=reads	TB-T2DM	European Nucleotide Archive
ERR3148211	https://www.ebi.ac.uk/ena/browser/view/ERR3148211?show=reads	TB-T2DM	European Nucleotide Archive
ERR3148216	https://www.ebi.ac.uk/ena/browser/view/ERR3148216?show=reads	TB-T2DM	European Nucleotide Archive
ERR3148217	https://www.ebi.ac.uk/ena/browser/view/ERR3148217?show=reads	TB-T2DM	European Nucleotide Archive
ERR3148222	https://www.ebi.ac.uk/ena/browser/view/ERR3148222?show=reads	TB-T2DM	European Nucleotide Archive
SRR10379945	https://www.ncbi.nlm.nih.gov/sra/SRR10379945	TB-T2DM	National Center of Biotechnology Information
SRR10379990	https://www.ncbi.nlm.nih.gov/sra/SRR10379990	TB-T2DM	National Center of Biotechnology Information
SRR10380047	https://www.ncbi.nlm.nih.gov/sra/SRR10380047	TB-T2DM	National Center of Biotechnology Information
SRR10380057	https://www.ncbi.nlm.nih.gov/sra/SRR10380057	TB-T2DM	National Center of Biotechnology Information
SRR10380076	https://www.ncbi.nlm.nih.gov/sra/SRR10380076	TB-T2DM	National Center of Biotechnology Information
SRR10397107	https://www.ncbi.nlm.nih.gov/sra/SRR10397107	TB-T2DM	National Center of Biotechnology Information
SRR10397170	https://www.ncbi.nlm.nih.gov/sra/SRR10397170	TB-T2DM	National Center of Biotechnology Information
SRR10397218	https://www.ncbi.nlm.nih.gov/sra/SRR10397218	TB-T2DM	National Center of Biotechnology Information
SRR10525360	https://www.ncbi.nlm.nih.gov/sra/SRR10525360	TB-T2DM	National Center of Biotechnology Information
SRR10808337	https://www.ncbi.nlm.nih.gov/sra/SRR10808337	TB-T2DM	National Center of Biotechnology Information
SRR10808353	https://www.ncbi.nlm.nih.gov/sra/SRR10808353	TB-T2DM	National Center of Biotechnology Information
SRR10808370	https://www.ncbi.nlm.nih.gov/sra/SRR10808370	TB-T2DM	National Center of Biotechnology Information
SRR10808409	https://www.ncbi.nlm.nih.gov/sra/SRR10808409	TB-T2DM	National Center of Biotechnology Information
SRR10808520	https://www.ncbi.nlm.nih.gov/sra/SRR10808520	TB-T2DM	National Center of Biotechnology Information
SRR10808546	https://www.ncbi.nlm.nih.gov/sra/SRR10808546	TB-T2DM	National Center of Biotechnology Information
SRR10808572	https://www.ncbi.nlm.nih.gov/sra/SRR10808572	TB-T2DM	National Center of Biotechnology Information
SRR10808574	https://www.ncbi.nlm.nih.gov/sra/SRR10808574	TB-T2DM	National Center of Biotechnology Information
SRR10808670	https://www.ncbi.nlm.nih.gov/sra/SRR10808670	TB-T2DM	National Center of Biotechnology Information
SRR10808688	https://www.ncbi.nlm.nih.gov/sra/SRR10808688	TB-T2DM	National Center of Biotechnology Information
SRR10808704	https://www.ncbi.nlm.nih.gov/sra/SRR10808704	TB-T2DM	National Center of Biotechnology Information
SRR10808770	https://www.ncbi.nlm.nih.gov/sra/SRR10808770	TB-T2DM	National Center of Biotechnology Information
SRR10808917	https://www.ncbi.nlm.nih.gov/sra/SRR10808917	TB-T2DM	National Center of Biotechnology Information
SRR10808970	https://www.ncbi.nlm.nih.gov/sra/SRR10808970	TB-T2DM	National Center of Biotechnology Information
SRR10808996	https://www.ncbi.nlm.nih.gov/sra/SRR10808996	TB-T2DM	National Center of Biotechnology Information
SRR10809086	https://www.ncbi.nlm.nih.gov/sra/SRR10809086	TB-T2DM	National Center of Biotechnology Information
SRR10809103	https://www.ncbi.nlm.nih.gov/sra/SRR10809103	TB-T2DM	National Center of Biotechnology Information
SRR10809123	https://www.ncbi.nlm.nih.gov/sra/SRR10809123	TB-T2DM	National Center of Biotechnology Information
SRR10809140	https://www.ncbi.nlm.nih.gov/sra/SRR10809140	TB-T2DM	National Center of Biotechnology Information
SRR10809207	https://www.ncbi.nlm.nih.gov/sra/SRR10809207	TB-T2DM	National Center of Biotechnology Information
SRR13232467	https://www.ncbi.nlm.nih.gov/sra/SRR13232467	TB-T2DM	National Center of Biotechnology Information
SRR13232573	https://www.ncbi.nlm.nih.gov/sra/SRR13232573	TB-T2DM	National Center of Biotechnology Information
SRR13232591	https://www.ncbi.nlm.nih.gov/sra/SRR13232591	TB-T2DM	National Center of Biotechnology Information
SRR13232779	https://www.ncbi.nlm.nih.gov/sra/SRR13232779	TB-T2DM	National Center of Biotechnology Information
SRR5153088	https://www.ncbi.nlm.nih.gov/sra/SRR5153088	TB-T2DM	National Center of Biotechnology Information
SRR5153332	https://www.ncbi.nlm.nih.gov/sra/SRR5153332	TB-T2DM	National Center of Biotechnology Information
SRR5153902	https://www.ncbi.nlm.nih.gov/sra/SRR5153902	TB-T2DM	National Center of Biotechnology Information
SRR5486869	https://www.ncbi.nlm.nih.gov/sra/SRR5486869	TB-T2DM	National Center of Biotechnology Information
SRR6356936	https://www.ncbi.nlm.nih.gov/sra/SRR6356936	TB-T2DM	National Center of Biotechnology Information
SRR6356938	https://www.ncbi.nlm.nih.gov/sra/SRR6356938	TB-T2DM	National Center of Biotechnology Information
SRR6357008	https://www.ncbi.nlm.nih.gov/sra/SRR6357008	TB-T2DM	National Center of Biotechnology Information
SRR7516353	https://www.ncbi.nlm.nih.gov/sra/SRR7516353	TB-T2DM	National Center of Biotechnology Information
SRR7516437	https://www.ncbi.nlm.nih.gov/sra/SRR7516437	TB-T2DM	National Center of Biotechnology Information
SRR9738495	https://www.ncbi.nlm.nih.gov/sra/SRR9738495	TB-T2DM	National Center of Biotechnology Information
G1312	ID of WGS provided by Dr. Iñaki Comas	TB-T2DM	Manuscript in preparation
G1521	ID of WGS provided by Dr. Iñaki Comas	TB-T2DM	Manuscript in preparation
G1523	ID of WGS provided by Dr. Iñaki Comas	TB-T2DM	Manuscript in preparation
G1573	ID of WGS provided by Dr. Iñaki Comas	TB-T2DM	Manuscript in preparation
G1657	ID of WGS provided by Dr. Iñaki Comas	TB-T2DM	Manuscript in preparation
G1672	ID of WGS provided by Dr. Iñaki Comas	TB-T2DM	Manuscript in preparation
G1934	ID of WGS provided by Dr. Iñaki Comas	TB-T2DM	Manuscript in preparation
G271	ID of WGS provided by Dr. Iñaki Comas	TB-T2DM	Manuscript in preparation
ERR3148156	https://www.ebi.ac.uk/ena/browser/view/ERR3148156?show=reads	TB	European Nucleotide Archive
ERR3148184	https://www.ebi.ac.uk/ena/browser/view/ERR3148184?show=reads	TB	European Nucleotide Archive
ERR3148198	https://www.ebi.ac.uk/ena/browser/view/ERR3148198?show=reads	TB	European Nucleotide Archive
ERR3148199	https://www.ebi.ac.uk/ena/browser/view/ERR3148199?show=reads	TB	European Nucleotide Archive
ERR3148201	https://www.ebi.ac.uk/ena/browser/view/ERR3148201?show=reads	TB	European Nucleotide Archive
ERR3148202	https://www.ebi.ac.uk/ena/browser/view/ERR3148202?show=reads	TB	European Nucleotide Archive
ERR3148203	https://www.ebi.ac.uk/ena/browser/view/ERR3148203?show=reads	TB	European Nucleotide Archive
ERR3148204	https://www.ebi.ac.uk/ena/browser/view/ERR3148204?show=reads	TB	European Nucleotide Archive
ERR3148205	https://www.ebi.ac.uk/ena/browser/view/ERR3148205?show=reads	TB	European Nucleotide Archive
ERR3148213	https://www.ebi.ac.uk/ena/browser/view/ERR3148213?show=reads	TB	European Nucleotide Archive
ERR3148225	https://www.ebi.ac.uk/ena/browser/view/ERR3148225?show=reads	TB	European Nucleotide Archive
SRR10379892	https://www.ncbi.nlm.nih.gov/sra/SRR10379892	TB	National Center of Biotechnology Information
SRR10379896	https://www.ncbi.nlm.nih.gov/sra/SRR10379903	TB	National Center of Biotechnology Information
SRR10379903	https://www.ncbi.nlm.nih.gov/sra/SRR10379903	TB	National Center of Biotechnology Information
SRR10379906	https://www.ncbi.nlm.nih.gov/sra/SRR10379906	TB	National Center of Biotechnology Information
SRR10379908	https://www.ncbi.nlm.nih.gov/sra/SRR10379908	TB	National Center of Biotechnology Information
SRR10379912	https://www.ncbi.nlm.nih.gov/sra/SRR10379912	TB	National Center of Biotechnology Information
SRR10379917	https://www.ncbi.nlm.nih.gov/sra/SRR10379917	TB	National Center of Biotechnology Information
SRR10379932	https://www.ncbi.nlm.nih.gov/sra/SRR10379932	TB	National Center of Biotechnology Information
SRR10379936	https://www.ncbi.nlm.nih.gov/sra/SRR10379936	TB	National Center of Biotechnology Information
SRR10379987	https://www.ncbi.nlm.nih.gov/sra/SRR10379987	TB	National Center of Biotechnology Information
SRR10380014	https://www.ncbi.nlm.nih.gov/sra/SRR10380014	TB	National Center of Biotechnology Information
SRR10380039	https://www.ncbi.nlm.nih.gov/sra/SRR10380039	TB	National Center of Biotechnology Information
SRR10380043	https://www.ncbi.nlm.nih.gov/sra/SRR10380043	TB	National Center of Biotechnology Information
SRR10380130	https://www.ncbi.nlm.nih.gov/sra/SRR10380130	TB	National Center of Biotechnology Information
SRR10397092	https://www.ncbi.nlm.nih.gov/sra/SRR10397092	TB	National Center of Biotechnology Information
SRR10397108	https://www.ncbi.nlm.nih.gov/sra/SRR10397108	TB	National Center of Biotechnology Information
SRR10397114	https://www.ncbi.nlm.nih.gov/sra/SRR10397114	TB	National Center of Biotechnology Information
SRR10397186	https://www.ncbi.nlm.nih.gov/sra/SRR10397186	TB	National Center of Biotechnology Information
SRR10397193	https://www.ncbi.nlm.nih.gov/sra/SRR10397193	TB	National Center of Biotechnology Information
SRR10397253	https://www.ncbi.nlm.nih.gov/sra/SRR10397253	TB	National Center of Biotechnology Information
SRR10397266	https://www.ncbi.nlm.nih.gov/sra/SRR10397266	TB	National Center of Biotechnology Information
SRR10525318	https://www.ncbi.nlm.nih.gov/sra/SRR10525318	TB	National Center of Biotechnology Information
SRR10525371	https://www.ncbi.nlm.nih.gov/sra/SRR10525371	TB	National Center of Biotechnology Information
SRR11033593	https://www.ncbi.nlm.nih.gov/sra/SRR11033593	TB	National Center of Biotechnology Information
SRR11033600	https://www.ncbi.nlm.nih.gov/sra/SRR11033600	TB	National Center of Biotechnology Information
SRR11033611	https://www.ncbi.nlm.nih.gov/sra/SRR11033611	TB	National Center of Biotechnology Information
SRR11033620	https://www.ncbi.nlm.nih.gov/sra/SRR11033620	TB	National Center of Biotechnology Information
SRR11033625	https://www.ncbi.nlm.nih.gov/sra/SRR11033625	TB	National Center of Biotechnology Information
SRR11033634	https://www.ncbi.nlm.nih.gov/sra/SRR11033634	TB	National Center of Biotechnology Information
SRR11033637	https://www.ncbi.nlm.nih.gov/sra/SRR11033637	TB	National Center of Biotechnology Information
SRR11033646	https://www.ncbi.nlm.nih.gov/sra/SRR11033646	TB	National Center of Biotechnology Information
SRR11033649	https://www.ncbi.nlm.nih.gov/sra/SRR11033649	TB	National Center of Biotechnology Information
SRR11033658	https://www.ncbi.nlm.nih.gov/sra/SRR11033658	TB	National Center of Biotechnology Information
SRR11033684	https://www.ncbi.nlm.nih.gov/sra/SRR11033684	TB	National Center of Biotechnology Information
SRR11033700	https://www.ncbi.nlm.nih.gov/sra/SRR11033700	TB	National Center of Biotechnology Information
SRR11033702	https://www.ncbi.nlm.nih.gov/sra/SRR11033702	TB	National Center of Biotechnology Information
SRR11033712	https://www.ncbi.nlm.nih.gov/sra/SRR11033712	TB	National Center of Biotechnology Information
SRR11033757	https://www.ncbi.nlm.nih.gov/sra/SRR11033757	TB	National Center of Biotechnology Information
SRR11033762	https://www.ncbi.nlm.nih.gov/sra/SRR11033762	TB	National Center of Biotechnology Information
SRR13232428	https://www.ncbi.nlm.nih.gov/sra/SRR13232428	TB	National Center of Biotechnology Information
SRR13232498	https://www.ncbi.nlm.nih.gov/sra/SRR13232498	TB	National Center of Biotechnology Information
SRR13232543	https://www.ncbi.nlm.nih.gov/sra/SRR13232543	TB	National Center of Biotechnology Information
SRR13232554	https://www.ncbi.nlm.nih.gov/sra/SRR13232554	TB	National Center of Biotechnology Information
SRR13232580	https://www.ncbi.nlm.nih.gov/sra/SRR13232580	TB	National Center of Biotechnology Information
SRR13232681	https://www.ncbi.nlm.nih.gov/sra/SRR13232681	TB	National Center of Biotechnology Information
SRR13232706	https://www.ncbi.nlm.nih.gov/sra/SRR13232706	TB	National Center of Biotechnology Information
SRR13232756	https://www.ncbi.nlm.nih.gov/sra/SRR13232756	TB	National Center of Biotechnology Information
SRR3544717	https://www.ncbi.nlm.nih.gov/sra/SRR3544717	TB	National Center of Biotechnology Information
SRR5152927	https://www.ncbi.nlm.nih.gov/sra/SRR5152927	TB	National Center of Biotechnology Information
SRR5153095	https://www.ncbi.nlm.nih.gov/sra/SRR5153095	TB	National Center of Biotechnology Information
SRR5486894	https://www.ncbi.nlm.nih.gov/sra/SRR5486894	TB	National Center of Biotechnology Information
SRR5486901	https://www.ncbi.nlm.nih.gov/sra/SRR5486901	TB	National Center of Biotechnology Information
SRR6458433	https://www.ncbi.nlm.nih.gov/sra/SRR6458433	TB	National Center of Biotechnology Information
SRR6458436	https://www.ncbi.nlm.nih.gov/sra/SRR6458436	TB	National Center of Biotechnology Information
SRR6458462	https://www.ncbi.nlm.nih.gov/sra/SRR6458462	TB	National Center of Biotechnology Information
SRR7516400	https://www.ncbi.nlm.nih.gov/sra/SRR7516400	TB	National Center of Biotechnology Information
SRR7516434	https://www.ncbi.nlm.nih.gov/sra/SRR7516434	TB	National Center of Biotechnology Information
SRR7592322	https://www.ncbi.nlm.nih.gov/sra/SRR7592322	TB	National Center of Biotechnology Information
SRR7592333	https://www.ncbi.nlm.nih.gov/sra/SRR7592333	TB	National Center of Biotechnology Information
SRR9738494	https://www.ncbi.nlm.nih.gov/sra/SRR9738494	TB	National Center of Biotechnology Information
SRR9738514	https://www.ncbi.nlm.nih.gov/sra/SRR9738514	TB	National Center of Biotechnology Information
SRR9738545	https://www.ncbi.nlm.nih.gov/sra/SRR9738545	TB	National Center of Biotechnology Information
SRR9738552	https://www.ncbi.nlm.nih.gov/sra/SRR9738552	TB	National Center of Biotechnology Information
